## **Biallelic mutation of *SUPV3LI* causes an inherited leukodystrophy-associated neurodevelopmental disorder due to aberrant mitochondrial double stranded RNA processing**

Lydia Green<sup>1,2φ</sup>, Noémie Hamilton<sup>3,4φ</sup>, Marilena Elpidorou<sup>2</sup>, Erica L. Harris<sup>2</sup>, Andrew Douglas<sup>5</sup>, Katrin Ounap<sup>6</sup>, Reza Maroofian<sup>7</sup>, Ailsa M.S. Rose<sup>2</sup>, Stone Elworthy<sup>3</sup>, Stephen A Renshaw<sup>3</sup>, Elizabeth C. Low<sup>3</sup>, Trine Prescott<sup>8</sup>, Kristoffer Soberg<sup>8</sup>, Almunder Al-Maawali<sup>9</sup>, Sana Al-Zuhaibi<sup>10</sup>, Amna Al Futaisi<sup>11</sup>, Daniel Calame<sup>12</sup>, Khalid Al-Thihli<sup>9</sup>, Eamonn G. Sheridan<sup>2</sup>, Colin A. Johnson<sup>2</sup>, John Livingston<sup>1</sup>, Yanick J. Crow<sup>13</sup>, James A Poulter<sup>2,\*</sup>.

<sup>1</sup>Department of Paediatric Neurology, Leeds Teaching Hospitals Trust, Leeds, UK.

<sup>2</sup>Leeds Institute of Medical Research, University of Leeds, Leeds, UK.

<sup>3</sup>Bateson Centre, Department of Infection, Immunity and Cardiovascular Disease, University of Sheffield, Sheffield, UK.

<sup>4</sup>York Biomedical research Institute, Department of Biology, University of York, UK

<sup>5</sup>Oxford Centre for Genomic Medicine, Oxford, UK.

<sup>6</sup>Institute of Clinical Medicine and Department of Clinical Genetics, University of Tartu, Estonia.

<sup>7</sup>Department of Neuromuscular Disorders, University College London, London, UK

<sup>8</sup>Department of Clinical Genetics, Oslo University Hospital, Norway.

<sup>9</sup>Department of Genetics, College of Medicine and Health Sciences, Sultan Qaboos University Hospital, Sultan Qaboos University, Oman

<sup>10</sup>Ophthalmology Department, College of Medicine and Health Sciences, Sultan Qaboos University Hospital, Sultan Qaboos University, Oman

<sup>11</sup>Pediatric Neurology Unit, College of Medicine and Health Sciences, Sultan Qaboos University Hospital, Sultan Qaboos University, Oman.

<sup>12</sup>BCM-GREGoR Rare Disease Research Center, Baylor College of Medicine, US.

<sup>13</sup>Institute of Genetics and Cancer, MRC Human Genetics Unit, University of Edinburgh, Scotland, UK.

‡ These authors contributed equally to this work.

\*Corresponding author: Dr James A Poulter, Email: [J.A.Poulter@leeds.ac.uk](mailto:J.A.Poulter@leeds.ac.uk)

### **Withdrawal Statement**

The authors have withdrawn their manuscript owing to an error identified by the corresponding author. Therefore, the authors do not wish this work to be cited as reference for the project. If you have any questions, please contact the corresponding author.
